# Supplementary material for: Depletion of tumor associated macrophages enhances local and systemic platelet-mediated anti-PD-1 delivery for post-surgery tumor recurrence treatment
Source: PubMed Central journal article supplement (PMC8987059; doi:10.1038/s41467-022-29388-0), 2022-04-06
Supplement: 41467_2022_29388_MOESM2_ESM.pdf [file 41467_2022_29388_MOESM2_ESM.pdf]

## Reporting Summary

Nature Portfolio wishes to improve the reproducibility of the work that we publish. This form provides structure for consistency and transparency in reporting. For further information on Nature Portfolio policies, see our [Editorial Policies](#) and the [Editorial Policy Checklist](#).

### Statistics

For all statistical analyses, confirm that the following items are present in the figure legend, table legend, main text, or Methods section.

n/a Confirmed

- |                                     |                                     |                                                                                                                                                                                                                                                            |
|-------------------------------------|-------------------------------------|------------------------------------------------------------------------------------------------------------------------------------------------------------------------------------------------------------------------------------------------------------|
| <input type="checkbox"/>            | <input checked="" type="checkbox"/> | The exact sample size ( $n$ ) for each experimental group/condition, given as a discrete number and unit of measurement                                                                                                                                    |
| <input type="checkbox"/>            | <input checked="" type="checkbox"/> | A statement on whether measurements were taken from distinct samples or whether the same sample was measured repeatedly                                                                                                                                    |
| <input type="checkbox"/>            | <input checked="" type="checkbox"/> | The statistical test(s) used AND whether they are one- or two-sided<br><i>Only common tests should be described solely by name; describe more complex techniques in the Methods section.</i>                                                               |
| <input type="checkbox"/>            | <input checked="" type="checkbox"/> | A description of all covariates tested                                                                                                                                                                                                                     |
| <input type="checkbox"/>            | <input checked="" type="checkbox"/> | A description of any assumptions or corrections, such as tests of normality and adjustment for multiple comparisons                                                                                                                                        |
| <input type="checkbox"/>            | <input checked="" type="checkbox"/> | A full description of the statistical parameters including central tendency (e.g. means) or other basic estimates (e.g. regression coefficient) AND variation (e.g. standard deviation) or associated estimates of uncertainty (e.g. confidence intervals) |
| <input type="checkbox"/>            | <input checked="" type="checkbox"/> | For null hypothesis testing, the test statistic (e.g. $F$ , $t$ , $r$ ) with confidence intervals, effect sizes, degrees of freedom and $P$ value noted<br><i>Give <math>P</math> values as exact values whenever suitable.</i>                            |
| <input checked="" type="checkbox"/> | <input type="checkbox"/>            | For Bayesian analysis, information on the choice of priors and Markov chain Monte Carlo settings                                                                                                                                                           |
| <input checked="" type="checkbox"/> | <input type="checkbox"/>            | For hierarchical and complex designs, identification of the appropriate level for tests and full reporting of outcomes                                                                                                                                     |
| <input checked="" type="checkbox"/> | <input type="checkbox"/>            | Estimates of effect sizes (e.g. Cohen's $d$ , Pearson's $r$ ), indicating how they were calculated                                                                                                                                                         |

*Our web collection on [statistics for biologists](#) contains articles on many of the points above.*

### Software and code

Policy information about [availability of computer code](#)

Data collection NIS-Elements (Version 4.60), Attune NxT Flow Cytometer System, In vivo imaging system, Agilent 1220 Infinity system, Malvern Zetasizer Software version 7.11, i-control 2.0 system, FEI Tecnai T-12 Cryo TEM system, Cryo SEM – JEOL 7600F.

Data analysis All statistical analyses are performed on Graphpad Prism (version 8). All flow cytometry data are analyzed on FlowJo software package (Version 10.4). Living image software (Perkin Elmer, version 4.5) is used to analyse bioluminescent and fluorescent images.

For manuscripts utilizing custom algorithms or software that are central to the research but not yet described in published literature, software must be made available to editors and reviewers. We strongly encourage code deposition in a community repository (e.g. GitHub). See the Nature Portfolio [guidelines for submitting code & software](#) for further information.

### Data

Policy information about [availability of data](#)

All manuscripts must include a [data availability statement](#). This statement should provide the following information, where applicable:

- Accession codes, unique identifiers, or web links for publicly available datasets
- A description of any restrictions on data availability
- For clinical datasets or third party data, please ensure that the statement adheres to our [policy](#)

The authors declare that all the data supporting the findings of this study are available within the article, the Supplementary Information and Source Data file.

## Field-specific reporting

Please select the one below that is the best fit for your research. If you are not sure, read the appropriate sections before making your selection.

Life sciences  Behavioural & social sciences  Ecological, evolutionary & environmental sciences

For a reference copy of the document with all sections, see [nature.com/documents/nr-reporting-summary-flat.pdf](https://www.nature.com/documents/nr-reporting-summary-flat.pdf)

## Life sciences study design

All studies must disclose on these points even when the disclosure is negative.

|                 |                                                                                                                                                                                                                                                                                                 |
|-----------------|-------------------------------------------------------------------------------------------------------------------------------------------------------------------------------------------------------------------------------------------------------------------------------------------------|
| Sample size     | The sample size are determined by G-power analysis software correspondingly.                                                                                                                                                                                                                    |
| Data exclusions | No data are excluded.                                                                                                                                                                                                                                                                           |
| Replication     | Experiments are repeated at least three time unless otherwise unless otherwise stated in the respective figure legend. Experimental findings are reproducible.                                                                                                                                  |
| Randomization   | Mice are allocated randomly to each treatment group.                                                                                                                                                                                                                                            |
| Blinding        | The investigator are not blinded for most of experiments since the experimental design, execution, and data analysis are performed by the same person. Bioluminescence imaging and tumor size measurement are conducted by an independent operator, who is unaware of the treatment conditions. |

## Reporting for specific materials, systems and methods

We require information from authors about some types of materials, experimental systems and methods used in many studies. Here, indicate whether each material, system or method listed is relevant to your study. If you are not sure if a list item applies to your research, read the appropriate section before selecting a response.

### Materials & experimental systems

| n/a                                 | Involved in the study                                           |
|-------------------------------------|-----------------------------------------------------------------|
| <input type="checkbox"/>            | <input checked="" type="checkbox"/> Antibodies                  |
| <input type="checkbox"/>            | <input checked="" type="checkbox"/> Eukaryotic cell lines       |
| <input checked="" type="checkbox"/> | <input type="checkbox"/> Palaeontology and archaeology          |
| <input type="checkbox"/>            | <input checked="" type="checkbox"/> Animals and other organisms |
| <input checked="" type="checkbox"/> | <input type="checkbox"/> Human research participants            |
| <input checked="" type="checkbox"/> | <input type="checkbox"/> Clinical data                          |
| <input checked="" type="checkbox"/> | <input type="checkbox"/> Dual use research of concern           |

### Methods

| n/a                                 | Involved in the study                              |
|-------------------------------------|----------------------------------------------------|
| <input checked="" type="checkbox"/> | <input type="checkbox"/> ChIP-seq                  |
| <input type="checkbox"/>            | <input checked="" type="checkbox"/> Flow cytometry |
| <input checked="" type="checkbox"/> | <input type="checkbox"/> MRI-based neuroimaging    |

## Antibodies

### Antibodies used

The following primary antibodies are used for immunofluorescence. They are listed as antigen first, followed by supplier, catalog number and clone/lot number as applicable.

- 1) Alexa Fluro 594 anti-mouse CD8a, BioLegend, cat.no.100758, Clone: 53-6.7;
- 2) Alexa Fluro 647 anti-mouse F4/80, BioLegend, cat.no.123121, Clone: BM8;

The following primary antibodies are used for flow cytometry. They are listed as antigen first, followed by supplier, catalog number and clone/lot number as applicable.

- 1) Anti-mouse CD45, Biolegend, cat. no. 103108, Clone: 30-F11;
- 2) Anti-mouse CD11b, Biolegend, cat. no. 101227, Clone: M1/70;
- 3) Anti-mouse IFN $\gamma$ , Biolegend, cat. no. 505806, Clone: XMG1.2;
- 4) Anti-mouse F4/80, Biolegend, cat. no. 123116, Clone: BM8;
- 5) Anti-mouse Granzyme B, Biolegend, cat. no. 372212, Clone: QA16A02;
- 6) Anti-mouse CD3, Biolegend, cat. no. 100236, Clone: 17A2;
- 7) Anti-mouse CD4, Biolegend, cat. no. 100406, Clone: GK1.5;
- 8) Anti-mouse CD8, Biolegend, cat. no. 100708, Clone: 53-6.7;
- 9) Anti-mouse CD45, Biolegend, cat. no. 103106, Clone: 30-F11;
- 10) Anti-mouse CD11b, Biolegend, cat. no. 101206, Clone: M1/70;

The following primary antibodies are used for ELISA. They are listed as antigen first, followed by supplier, catalog number and clone/lot number as applicable.

- 1) Anti-rat IgG, eBioscience, cat. no. 88-50490-22;

- 2) Anti-mouse TNF- $\alpha$ , Biolegend, cat. no. 430904;  
3) Anti-mouse IFN gamma, Biolegend, cat. no. 430804;

Validation All antibodies and ELISA kits used in this manuscript are commercially available. The validation and quality control are performed by the corresponding vendors.

## Eukaryotic cell lines

Policy information about [cell lines](#)

Cell line source(s) The murine cell line B16F10, 4T1, CT-26, S180, Raw 264.7 and NIH/3T3 are purchased from ATCC. B16F10-luc, 4T1-Luc and CT26-Luc cells are purchased from Imanis Life Sciences.

Authentication The cell lines were morphologically confirmed according to the information provided by ATCC and Imanis Life Sciences.

Mycoplasma contamination All cell lines are tested for mycoplasma contamination. No mycoplasma contamination is found.

Commonly misidentified lines (See [ICLAC](#) register) No commonly misidentified cell lines are used.

## Animals and other organisms

Policy information about [studies involving animals](#); [ARRIVE guidelines](#) recommended for reporting animal research

Laboratory animals Male C57BL/6 mice (6-8 weeks), male Rag-/- mice (6-8 weeks), and female and male Balb/c mice (6-8 weeks) are purchased from Jackson Lab. The animals are housed in the pathogen-free facility with a 12 h light/dark cycle at  $20 \pm 3$  °C and have ad libitum access to food and water.

Wild animals The study does not involve wild animals.

Field-collected samples The study does not involve samples collected from field.

Ethics oversight The animal study protocol has been approved by the Institutional Animal Care and Use Committee at the University of Wisconsin-Madison.

Note that full information on the approval of the study protocol must also be provided in the manuscript.

## Flow Cytometry

### Plots

Confirm that:

- The axis labels state the marker and fluorochrome used (e.g. CD4-FITC).
- The axis scales are clearly visible. Include numbers along axes only for bottom left plot of group (a 'group' is an analysis of identical markers).
- All plots are contour plots with outliers or pseudocolor plots.
- A numerical value for number of cells or percentage (with statistics) is provided.

### Methodology

Sample preparation For tissue samples, the tissue is chopped to small pieces, digested by collagenase and then mechanically processed to form single cell suspensions through 40  $\mu$ m cell strainer for flow cytometry analysis.

Instrument ThermoFisher Attune Flow Cytometer

Software FlowJo software package (version 10.4; TreeStar, USA, 2014)

Cell population abundance No sorting is performed.

Gating strategy The gating strategies are displayed in the supplementary information.

- Tick this box to confirm that a figure exemplifying the gating strategy is provided in the Supplementary Information.
